# Supplementary material for: Causal effects for genetic variants of osteoprotegerin on the risk of acute myocardial infarction and coronary heart disease: A two-sample Mendelian randomization study
Source: Front Cardiovasc Med. 2023 Mar 7;10:1041231. doi: 10.3389/fcvm.2023.1041231 (PMC10028206; doi:10.3389/fcvm.2023.1041231)
Supplement: Supplementary file 5 [file Table_6.XLSX]

## Sheet: Sheet1
ID	Trait	Position	P	SE	N	Beta	CHR	EA	NEA	EAF
ebi-a-GCST90013405	Liver enzyme levels (alanine transaminase)	44368122	2.19786e-258	0.000536501	437267	0.018358	22	G	A	0.155222
ukb-d-30620_raw	Alanine aminotransferase	44368122	9.68278e-218	0.044849	344136	1.4136	22	G	A	0.1547
ukb-d-30620_irnt	Alanine aminotransferase	44368122	2.67301e-172	0.003084	344136	0.086347	22	G	A	0.1547
ukb-d-30650_irnt	Aspartate aminotransferase	44368122	4.42588e-155	0.0031573	342990	0.083804	22	G	A	0.15472
ukb-d-30650_raw	Aspartate aminotransferase	44368122	5.95662e-135	0.034739	342990	0.85927	22	G	A	0.15472
ebi-a-GCST90012110	Sex hormone-binding globulin levels adjusted for BMI	44368122	3.19963e-69	0.00116169	368929	0.0204821	22	G	A	0.155359
ebi-a-GCST90012111	Sex hormone-binding globulin levels	44368122	2.19989e-68	0.00129289	370125	0.0227472	22	G	A	0.155352
ebi-a-GCST90012108	Sex hormone-binding globulin levels adjusted for BMI	44368122	2.49977e-61	0.00159501	180094	0.0262046	22	G	A	0.155702
ebi-a-GCST90012109	Sex hormone-binding globulin levels	44368122	3.19963e-61	0.00170117	180726	0.0277111	22	G	A	0.155697
ebi-a-GCST90016673	Percent liver fat	44368122	4.60045e-59	0.0106463	32858	0.172526	22	G	A	0.153451
bbj-a-8	Aspartate aminotransferase	44368122	4.26973e-53	0.003788		0.0581	22	G	A	0.4228
ieu-b-4871	Sex hormone binding globulin (SHBG)	44368122	2.39994e-48	0.0043695		0.0638456	22	G	A	0.155852
bbj-a-6	Alanine aminotransferase	44368122	1.27614e-43	0.003829		0.05303	22	G	A	0.4228
ukb-d-30830_irnt	SHBG	44368122	7.49204e-41	0.0031314	312215	0.041917	22	G	A	0.15473
ebi-a-GCST90012113	Total testosterone levels	44368122	7.70016e-28	0.00419037	194453	0.0465387	22	G	A	0.155819
ieu-b-4865	Total Testosterone	44368122	1.39991e-26	0.00426778		0.0455523	22	G	A	0.155799
finn-b-CIRRHOSIS_BROAD	Cirrhosis, broad definition used in the article https://doi.org/10.1101/594523	44368122	8.80035e-23	0.0405		0.3978	22	G	A	0.2244
eqtl-a-ENSG00000100347	ENSG00000100347	44368122	1.79432e-22	0.0153262	31300	0.149474	22	G	A	0.183451
ebi-a-GCST90002358	Platelet count	44368122	1.9002e-22	0.003744	145648	-0.036522	22	G	A	0.418585
ukb-d-30830_raw	SHBG	44368122	3.33196e-22	0.087725	312215	0.8501	22	G	A	0.15473
met-d-IDL_PL_pct	Phospholipids to total lipids ratio in IDL	44368122	1.20005e-20	0.00572795		0.0511582	22	G	A	0.155299
ebi-a-GCST90012107	Sex hormone-binding globulin levels	44368122	1.29987e-20	0.00197194	189473	0.0187375	22	G	A	0.155017
ebi-a-GCST90012106	Sex hormone-binding globulin levels adjusted for BMI	44368122	1.10002e-19	0.00171755	188908	0.0153994	22	G	A	0.155028
ebi-a-GCST90002304	Hematocrit	44368122	5.03037e-19	0.002535	562259	0.022611	22	G	A	0.15646
ukb-d-30850_raw	Testosterone	44368122	8.59805e-19	0.0093346	312102	0.082635	22	G	A	0.15508
ukb-d-30080_irnt	Platelet count	44368122	2.24233e-18	0.00319157	350474	-0.0279099	22	G	A	0.154768
finn-b-NAFLD	Nonalcoholic fatty liver disease	44368122	9.71404e-18	0.06		0.5144	22	G	A	0.2244
ieu-b-4870	Sex hormone binding globulin (SHBG)	44368122	1.50003e-17	0.00409702		0.0349416	22	G	A	0.155045
finn-b-K11_LIVER	Diseases of liver	44368122	1.53709e-17	0.0245		0.209	22	G	A	0.2244
bbj-a-49	Platelet count	44368122	1.10892e-15	0.004264		-0.03418	22	G	A	0.4228
ukb-d-30020_irnt	Haemoglobin concentration	44368122	2.29562e-15	0.00261352	350474	0.0207111	22	G	A	0.154768
finn-b-K11_ALCOLIV	Alcoholic liver disease (K11_ALCOLIV)	44368122	5.05126e-15	0.0468		0.3666	22	G	A	0.2239
ukb-d-30090_irnt	Platelet crit	44368122	9.68055e-15	0.00313783	350471	-0.0242985	22	G	A	0.154766
finn-b-ALCOLIVER	Alcoholic liver disease (ALCOLIVER)	44368122	9.85825e-15	0.0467		0.3618	22	G	A	0.2244
ebi-a-GCST90012114	Total testosterone levels	44368122	1.10002e-14	0.00177653	425097	0.0140739	22	G	A	0.155381
met-d-XXL_VLDL_FC_pct	Free cholesterol to total lipids ratio in chylomicrons and extremely large VLDL	44368122	3.69999e-14	0.00568025		0.0418244	22	G	A	0.155351
finn-b-CHIRHEP_NAS	Chirrosis of liver, NAS	44368122	6.72048e-14	0.0826		0.6191	22	G	A	0.224
met-d-SFA_pct	Ratio of saturated fatty acids to total fatty acids	44368122	8.30042e-14	0.00562882		-0.0420193	22	G	A	0.155271
met-d-LDL_size	Average diameter for LDL particles	44368122	1.50003e-13	0.00557693		0.0412829	22	G	A	0.155299
finn-b-I9_VARICVEOES_EXNONE	Oesophageal varices (no controls excluded)	44368122	3.88061e-13	0.0813		0.5901	22	G	A	0.2244
finn-b-I9_VARICVEOES	Oesophageal varices	44368122	5.21555e-13	0.0812		0.5866	22	G	A	0.2246
met-d-XXL_VLDL_TG_pct	Triglycerides to total lipids ratio in chylomicrons and extremely large VLDL	44368122	2.39994e-12	0.00575333		-0.0396275	22	G	A	0.155351
met-d-XXL_VLDL_C_pct	Cholesterol to total lipids ratio in chylomicrons and extremely large VLDL	44368122	4.60045e-12	0.00571687		0.0384773	22	G	A	0.155351
ukb-d-30850_irnt	Testosterone	44368122	7.27277e-12	0.0021066	312102	0.014435	22	G	A	0.15508
ukb-d-30050_irnt	Mean corpuscular haemoglobin	44368122	7.6454e-12	0.00326394	350472	0.0223426	22	G	A	0.154768
finn-b-K11_DISLIVOTH	Other diseases of liver	44368122	6.55089e-11	0.0362		0.2364	22	G	A	0.2239
ukb-d-30880_raw	Urate	44368122	1.17079e-10	0.22667	343836	-1.4605	22	G	A	0.1547
met-d-XXL_VLDL_PL_pct	Phospholipids to total lipids ratio in chylomicrons and extremely large VLDL	44368122	1.6e-10	0.00574125		0.036333	22	G	A	0.155351
ukb-d-30880_irnt	Urate	44368122	2.3735e-10	0.0028091	343836	-0.017796	22	G	A	0.1547
finn-b-K11_FIBROCHIRLIV	Fibrosis and chirrhosis of liver	44368122	3.27401e-10	0.0615		0.3865	22	G	A	0.2238
ieu-b-107	apolipoprotein A-I	44368122	4.70002e-10	0.00271431		-0.0169078	22	G	A	0.155453
met-d-IDL_C_pct	Cholesterol to total lipids ratio in IDL	44368122	5.99998e-10	0.0055765		-0.0329618	22	G	A	0.155299
ukb-d-30030_irnt	Haematocrit percentage	44368122	6.81224e-10	0.00268648	350475	0.0165771	22	G	A	0.154767
ebi-a-GCST90002404	Red cell distribution width	44368122	7.79992e-10	0.0029334	408112	-0.0180347	22	G	A	0.155173
ebi-a-GCST004603	Platelet count	44368122	9.778e-10	0.00503282	166066	-0.0307656	22	G	A	0.1549
ebi-a-GCST90002323	Mean corpuscular hemoglobin	44368122	1.09001e-09	0.004122	119629	0.025145	22	G	A	0.421617
ebi-a-GCST90012002	Osteoprotegerin levels	44368122	2.94999e-09	0.0117	21758	0.0697	22	G	A	0.1835
ukb-d-K11_LIVER	Diseases of liver	44368122	7.1123e-09	0.000220214	361194	0.00127468	22	G	A	0.154734
ieu-b-30	white blood cell count	44368122	7.58001e-09	0.002539	560509	-0.014677	22	G	A	0.156487
met-d-LA_pct	Ratio of linoleic acid to total fatty acids	44368122	1.2e-08	0.0055838		0.0306064	22	G	A	0.155271
met-d-XXL_VLDL_CE_pct	Cholesteryl esters to total lipids ratio in chylomicrons and extremely large VLDL	44368122	1.29999e-08	0.00574835		0.0321412	22	G	A	0.155351
ukb-e-30650_CSA	Aspartate aminotransferase	44368122	1.54301e-08	0.01883		-0.1065	22	G	A	0.8029
ukb-d-30630_raw	Apoliprotein A	44368122	1.562e-08	0.00086772	313387	-0.0049067	22	G	A	0.15475
ukb-d-30870_raw	Triglycerides	44368122	1.72488e-08	0.0033121	343992	-0.018672	22	G	A	0.15472
met-d-L_VLDL_CE_pct	Cholesteryl esters to total lipids ratio in large VLDL	44368122	2e-08	0.00546291		0.0304338	22	G	A	0.155296
ebi-a-GCST90002335	Mean corpuscular volume	44368122	2.33002e-08	0.004095	121047	0.02289	22	G	A	0.421623
ukb-d-30630_irnt	Apoliprotein A	44368122	2.5053e-08	0.0031994	313387	-0.01783	22	G	A	0.15475
met-d-XS_VLDL_PL_pct	Phospholipids to total lipids ratio in very small VLDL	44368122	2.80001e-08	0.00557022		0.0296577	22	G	A	0.155299
ebi-a-GCST90002412	Low density lipoprotein cholesterol levels	44368122	3.59998e-08	0.00265562	431167	-0.0146258	22	G	A	0.155271
ukb-d-30190_irnt	Monocyte percentage	44368122	3.81821e-08	0.0031914	349861	0.0175501	22	G	A	0.154779
bbj-a-38	Mean corpuscular hemoglobin	44368122	5.13606e-08	0.004275		0.02328	22	G	A	0.4228
met-d-IDL_CE_pct	Cholesteryl esters to total lipids ratio in IDL	44368122	6.19998e-08	0.00560252		-0.0287912	22	G	A	0.155299
ukb-d-30070_irnt	Red blood cell (erythrocyte) distribution width	44368122	9.22401e-08	0.00327787	350473	-0.0175087	22	G	A	0.154765
bbj-a-105	Cirrhosis	44368122	1.0354e-07	0.030808		0.163911	22	G	A	0.422298
ieu-b-34	neutrophil cell count	44368122	1.33999e-07	0.002652	517884	-0.013996	22	G	A	0.155824
met-d-L_VLDL_TG_pct	Triglycerides to total lipids ratio in large VLDL	44368122	1.40001e-07	0.00567959		-0.0289972	22	G	A	0.155296
ukb-d-30040_irnt	Mean corpuscular volume	44368122	1.44441e-07	0.00327174	350473	0.0172081	22	G	A	0.154765
met-d-L_VLDL_C_pct	Cholesterol to total lipids ratio in large VLDL	44368122	1.6e-07	0.00557468		0.0288068	22	G	A	0.155296
met-d-S_LDL_PL_pct	Phospholipids to total lipids ratio in small LDL	44368122	2.80001e-07	0.00569778		0.0290969	22	G	A	0.155299
ebi-a-GCST007518	Type 2 diabetes (adjusted for BMI)	44368122	3.32598e-07	0.0082	298957	0.0363	22	G	A
ebi-a-GCST007516	Type 2 diabetes (adjusted for BMI)	44368122	3.32598e-07	0.0082	298957	0.0363	22	G	A	0.1987
ukb-d-30690_raw	Cholesterol	44368122	3.51439e-07	0.0036584	344278	-0.018635	22	G	A	0.15473
met-d-VLDL_size	Average diameter for VLDL particles	44368122	4.30002e-07	0.00532635		-0.0255761	22	G	A	0.155299
met-d-XXL_VLDL_TG	Triglycerides in chylomicrons and extremely large VLDL	44368122	4.60002e-07	0.00551064		-0.0266431	22	G	A	0.155299
bbj-a-40	Mean corpuscular volume	44368122	5.22805e-07	0.004276		0.02146	22	G	A	0.4228
ukb-d-30840_irnt	Total bilirubin	44368122	5.74077e-07	0.0031775	342829	0.015887	22	G	A	0.15472
met-d-DHA_pct	Ratio of docosahexaenoic acid to total fatty acids	44368122	6.1e-07	0.00555509		0.0283059	22	G	A	0.155271
ebi-a-GCST007515	Type 2 diabetes	44368122	6.409e-07	0.0079	298957	0.0333	22	G	A	0.1947
ukb-d-30690_irnt	Cholesterol	44368122	6.53055e-07	0.0032019	344278	-0.015929	22	G	A	0.15473
met-d-XL_HDL_FC_pct	Free cholesterol to total lipids ratio in very large HDL	44368122	8.9e-07	0.00506521		-0.0249433	22	G	A	0.155294
met-d-GlycA	Glycoprotein acetyls	44368122	1e-06	0.00568562		-0.0284807	22	G	A	0.155299
ukb-e-30830_CSA	SHBG	44368122	1.13799e-06	0.01832		-0.08913	22	G	A	0.8014
ebi-a-GCST006804	Red cell distribution width	44368122	1.29999e-06	0.00546941	116666	-0.0270303	22	G	A	0.155062
ebi-a-GCST004630	Mean corpuscular hemoglobin	44368122	1.31299e-06	0.00487336	172332	0.0235761	22	G	A	0.155
ebi-a-GCST006867	Type 2 diabetes	44368122	1.409e-06	0.0106	62892	0.0512	22	G	A	0.155963
ebi-a-GCST004621	Sum basophil neutrophil counts	44368122	1.84302e-06	0.00487704	171529	-0.0232633	22	G	A	0.155
ebi-a-GCST004607	Plateletcrit	44368122	1.84799e-06	0.00505186	164339	-0.0240943	22	G	A	0.1548
met-d-Gln	Glutamine	44368122	1.89998e-06	0.00571073		0.0281065	22	G	A	0.155303
met-d-S_HDL_CE	Cholesteryl esters in small HDL	44368122	1.89998e-06	0.00571653		-0.0266634	22	G	A	0.155299
ebi-a-GCST004615	Hemoglobin concentration	44368122	2.03002e-06	0.00488808	172925	0.0232204	22	G	A	0.155
ebi-a-GCST90001712	BAFF-R on IgD- CD38- B cell	44368122	2.12202e-06	0.03334	3657	-0.1583	22	G	A	0.1671
ebi-a-GCST90001718	BAFF-R on switched memory B cell	44368122	2.30399e-06	0.03347	3657	-0.1584	22	G	A	0.1671
met-d-Tyr	Tyrosine	44368122	2.80001e-06	0.00569856		0.02668	22	G	A	0.155325
met-d-S_HDL_P	Concentration of small HDL particles	44368122	3.50002e-06	0.00570872		-0.0258507	22	G	A	0.155299
met-d-XL_HDL_PL_pct	Phospholipids to total lipids ratio in very large HDL	44368122	3.50002e-06	0.00524608		0.0249646	22	G	A	0.155294
ebi-a-GCST90001702	BAFF-R on CD24+ CD27+ B cell	44368122	3.66699e-06	0.03345	3657	-0.1551	22	G	A	0.1671
ieu-b-4816	Body mass index	44368122	3.96397e-06	0.0248	110416	-0.1144	22	G	A
ukb-b-13251	Non-cancer illness code, self-reported: gout	44368122	4.70002e-06	0.000336426	462933	-0.00154057	22	G	A	0.155423
met-d-S_HDL_FC_pct	Free cholesterol to total lipids ratio in small HDL	44368122	4.79999e-06	0.00542011		0.0244039	22	G	A	0.155299
ebi-a-GCST90001715	BAFF-R on memory B cell	44368122	4.95496e-06	0.03341	3657	-0.1528	22	G	A	0.1671
ebi-a-GCST90012102	Bioavailable testosterone levels	44368122	5.89997e-06	0.00351008	188507	-0.0160871	22	G	A	0.15505
ukb-d-30840_raw	Total bilirubin	44368122	6.27885e-06	0.014323	342829	0.064695	22	G	A	0.15472
met-d-XL_VLDL_FC_pct	Free cholesterol to total lipids ratio in very large VLDL	44368122	6.29999e-06	0.00553352		0.0245702	22	G	A	0.155293
ebi-a-GCST90001710	BAFF-R on IgD- CD24- B cell	44368122	7.08696e-06	0.03336	3657	-0.15	22	G	A	0.1671
bbj-a-54	Total cholesterol	44368122	7.31206e-06	0.003934		-0.01764	22	G	A	0.4228
ebi-a-GCST90012035	Tumor necrosis factor receptor superfamily member 6 levels	44368122	7.62097e-06	0.0119	21758	0.0531	22	G	A	0.1832
ukb-b-10912	Non-cancer illness code, self-reported: high cholesterol	44368122	8.9e-06	0.000934996	462933	-0.00415433	22	G	A	0.155423
ebi-a-GCST90001703	BAFF-R on IgD+ CD24+ B cell	44368122	9.52292e-06	0.03345	3657	-0.1483	22	G	A	0.1671
ebi-a-GCST90001829	BAFF-R on B cell	44368122	1.05599e-05	0.03346	3660	-0.1476	22	G	A	0.1671
ebi-a-GCST90001717	BAFF-R on unswitched memory B cell	44368122	1.09499e-05	0.03342	3657	-0.1472	22	G	A	0.1671
ukb-a-216	Illnesses of mother: Diabetes	44368122	1.11882e-05	0.00100307	308780	0.00440638	22	G	A	0.155339
ebi-a-GCST90001716	BAFF-R on naive-mature B cell	44368122	1.22899e-05	0.03348	3657	-0.1466	22	G	A	0.1671
met-d-S_LDL_CE_pct	Cholesteryl esters to total lipids ratio in small LDL	44368122	1.29999e-05	0.00569869		-0.0245339	22	G	A	0.155299
met-d-XL_HDL_PL	Phospholipids in very large HDL	44368122	1.40001e-05	0.00513803		0.0227317	22	G	A	0.155299
met-d-XL_VLDL_TG_pct	Triglycerides to total lipids ratio in very large VLDL	44368122	1.5e-05	0.00553272		-0.023316	22	G	A	0.155293
met-d-S_HDL_C	Cholesterol in small HDL	44368122	1.5e-05	0.00569818		-0.0241541	22	G	A	0.155299
ukb-d-30760_raw	HDL cholesterol	44368122	1.89889e-05	0.0012108	315133	-0.005178	22	G	A	0.15471
met-d-XL_VLDL_C_pct	Cholesterol to total lipids ratio in very large VLDL	44368122	2e-05	0.00547411		0.0223717	22	G	A	0.155293
ebi-a-GCST90001711	BAFF-R on IgD- CD27- B cell	44368122	2.08401e-05	0.0333	3657	-0.1419	22	G	A	0.1671
ukb-b-15895	Treatment/medication code: allopurinol	44368122	2.19999e-05	0.000301986	462933	-0.00128176	22	G	A	0.155423
ukb-b-19953	Body mass index (BMI)	44368122	2.19999e-05	0.0027357	461460	-0.0116048	22	G	A	0.155436
met-d-S_HDL_L	Total lipids in small HDL	44368122	2.30001e-05	0.00568861		-0.0229861	22	G	A	0.155299
met-d-XXL_VLDL_L	Total lipids in chylomicrons and extremely large VLDL	44368122	2.5e-05	0.00550175		-0.0222814	22	G	A	0.155299
met-d-IDL_TG	Triglycerides in IDL	44368122	2.59998e-05	0.00564335		0.0231882	22	G	A	0.155299
met-d-L_LDL_PL_pct	Phospholipids to total lipids ratio in large LDL	44368122	2.69998e-05	0.00570898		-0.0225963	22	G	A	0.155299
met-d-XS_VLDL_PL	Phospholipids in very small VLDL	44368122	2.90001e-05	0.00562815		0.0236921	22	G	A	0.155299
met-d-S_HDL_PL	Phospholipids in small HDL	44368122	3.09999e-05	0.00565888		-0.0221485	22	G	A	0.155299
ukb-b-2303	Body mass index (BMI)	44368122	3.09999e-05	0.0027562	454884	-0.0114832	22	G	A	0.155408
met-a-570	X-12063	44368122	3.20597e-05	0.0067	6797	-0.0278	22	G	A	0.1657
met-d-IDL_TG_pct	Triglycerides to total lipids ratio in IDL	44368122	3.29997e-05	0.00552024		0.0221658	22	G	A	0.155299
ukb-d-30660_raw	Direct bilirubin	44368122	3.49374e-05	0.0030007	292933	0.012419	22	G	A	0.15527
met-d-S_LDL_C_pct	Cholesterol to total lipids ratio in small LDL	44368122	3.59998e-05	0.00572945		-0.023158	22	G	A	0.155299
ieu-a-274	Packed cell volume	44368122	3.70399e-05	0.0232	48711	0.0949	22	G	A
ukb-b-19921	Impedance of whole body	44368122	4e-05	0.0020959	454840	0.00860974	22	G	A	0.155404
ebi-a-GCST90001719	BAFF-R on IgD+ B cell	44368122	4.314e-05	0.03344	3658	-0.1369	22	G	A	0.167
ukb-d-30660_irnt	Direct bilirubin	44368122	4.36858e-05	0.00345	292933	0.0141	22	G	A	0.15527
met-d-XL_HDL_L	Total lipids in very large HDL	44368122	4.39997e-05	0.00513725		0.0213481	22	G	A	0.155299
ebi-a-GCST90001709	BAFF-R on IgD+ CD38dim B cell	44368122	4.40403e-05	0.03345	3657	-0.1368	22	G	A	0.1671
ukb-d-30060_irnt	Mean corpuscular haemoglobin concentration	44368122	4.561e-05	0.00326994	350468	0.0133319	22	G	A	0.154762
ukb-b-16451	Illnesses of mother: Diabetes	44368122	4.60002e-05	0.000875837	423892	0.00356978	22	G	A	0.155506
ebi-a-GCST90001705	BAFF-R on IgD+ CD38- B cell	44368122	4.80496e-05	0.03343	3645	-0.136	22	G	A	0.1671
ebi-a-GCST004599	Mean platelet volume	44368122	4.95302e-05	0.00499736	164454	0.0202785	22	G	A	0.1548
met-d-XL_VLDL_CE_pct	Cholesteryl esters to total lipids ratio in very large VLDL	44368122	5e-05	0.00547686		0.0210304	22	G	A	0.155293
ukb-b-13803	Operative procedures - main OPCS: J18.3 Total cholecystectomy NEC	44368122	5e-05	0.000423221	463010	-0.00171576	22	G	A	0.155427
ukb-d-K11_GALLBILPANC	Disorders of gallbladder, biliary tract and pancreas	44368122	5.25799e-05	0.000624617	361194	-0.00252589	22	G	A	0.154734
ukb-d-30760_irnt	HDL cholesterol	44368122	5.42888e-05	0.0031464	315133	-0.0127	22	G	A	0.15471
ebi-a-GCST90001704	BAFF-R on IgD+ CD24- B cell	44368122	5.61694e-05	0.03343	3657	-0.1348	22	G	A	0.1671
ebi-a-GCST90001720	BAFF-R on transitional B cell	44368122	5.82707e-05	0.03358	3655	-0.1351	22	G	A	0.1669
ebi-a-GCST008039	Platelet count	44368122	6.36121e-05	0.610508	18949	-2.44142	22	G	A	0.226081
bbj-a-30	Lactate dehydrogenase	44368122	6.48605e-05	0.004021		0.01606	22	G	A	0.4228
ukb-d-30100_irnt	Mean platelet (thrombocyte) volume	44368122	6.76301e-05	0.00329752	350470	0.013139	22	G	A	0.154766
ieu-a-270	Haemoglobin concentration	44368122	6.95793e-05	0.0074	56784	0.0291	22	G	A
met-d-DHA	Docosahexaenoic acid	44368122	7.00003e-05	0.00551803		0.0232343	22	G	A	0.155271
ieu-b-109	HDL cholesterol	44368122	7.69999e-05	0.00263908		-0.0104362	22	G	A	0.155418
ukb-d-30710_irnt	C-reactive protein	44368122	7.98546e-05	0.0033024	343524	-0.013028	22	G	A	0.15471
met-d-XL_HDL_CE	Cholesteryl esters in very large HDL	44368122	8.70001e-05	0.00512151		0.0204556	22	G	A	0.155299
ebi-a-GCST90001708	BAFF-R on IgD+ CD38+ B cell	44368122	8.75508e-05	0.03354	3656	-0.1317	22	G	A	0.167
ukb-b-14068	Impedance of leg (left)	44368122	8.99995e-05	0.0025138	454857	0.0098413	22	G	A	0.155409
prot-c-2731_29_2	NADPH-P450 Oxidoreductase	44368122	9.66296e-05	0.055249	996	0.2163	22	G	A
bbj-a-159	Coronary artery disease	44368122	0.000101256	0.00957545	212453	-0.0372252	22	G	A	0.422298
ukb-e-30620_CSA	Alanine aminotransferase	44368122	0.0001033	0.0184		-0.07143	22	G	A	0.803
ebi-a-GCST90012026	Tumor necrosis factor receptor 2 levels	44368122	0.000103999	0.0118	21758	0.0459	22	G	A	0.1834
ukb-a-107	Non-cancer illness code self-reported: gout	44368122	0.000104773	0.000396037	337159	-0.00153635	22	G	A	0.155339
ebi-a-GCST90012053	Cathepsin D levels	44368122	0.000107701	0.0119	21758	0.0462	22	G	A	0.1833
met-d-IDL_FC_pct	Free cholesterol to total lipids ratio in IDL	44368122	0.000109999	0.00566349		-0.0216008	22	G	A	0.155299
prot-a-1397	Intercellular adhesion molecule 1	44368122	0.000114815	0.0341	3301	0.1313	22	G	A	0.15576
finn-b-K11_GALLBILPANC	Disorders of gallbladder, biliary tract and pancreas	44368122	0.000115401	0.0129		-0.0498	22	G	A	0.2244
ieu-b-39	diastolic blood pressure	44368122	0.0001163	0.0236	756001	0.0909	22	G	A	0.1615
ukb-d-30000_irnt	White blood cell (leukocyte) count	44368122	0.000139245	0.00328769	350470	-0.0125246	22	G	A	0.154766
ukb-b-7859	Impedance of arm (right)	44368122	0.00015	0.00194502	454826	0.00737511	22	G	A	0.155415
bbj-a-158	hepatocellular carcinoma	44368122	0.000154007	0.0334215		0.126484	22	G	A	0.422231
ebi-a-GCST90012070	Matrix metalloproteinase-12 levels	44368122	0.000162401	0.0132	21758	0.0497	22	G	A	0.1842
ebi-a-GCST90001707	BAFF-R on IgD+ CD38- unswitched memory B cell	44368122	0.000165299	0.04484	1837	-0.1692	22	G	A	0.1764
met-a-345	Urate	44368122	0.000178	0.0017	7371	-0.0065	22	G	A	0.1644
ukb-a-269	Impedance of whole body	44368122	0.000178349	0.00255463	331284	0.00957451	22	G	A	0.155339
bbj-a-55	Triglyceride	44368122	0.000188699	0.004319		-0.01613	22	G	A	0.4228
met-d-XL_HDL_C	Cholesterol in very large HDL	44368122	0.000189998	0.0051563		0.0194915	22	G	A	0.155299
ebi-a-GCST004604	Hematocrit	44368122	0.0002227	0.00486765	173039	0.0179701	22	G	A	0.1551
ukb-d-30270_irnt	Mean sphered cell volume	44368122	0.000225886	0.00330972	344729	0.0122069	22	G	A	0.154729
met-d-L_LDL_FC_pct	Free cholesterol to total lipids ratio in large LDL	44368122	0.000230001	0.00544877		-0.0190879	22	G	A	0.155299
met-d-XS_VLDL_TG	Triglycerides in very small VLDL	44368122	0.000230001	0.00562456		0.0200976	22	G	A	0.155299
met-d-PUFA_pct	Ratio of polyunsaturated fatty acids to total fatty acids	44368122	0.000239999	0.00549473		0.0204168	22	G	A	0.155271
ukb-a-108	Non-cancer illness code self-reported: high cholesterol	44368122	0.000265369	0.00109808	337159	-0.00400468	22	G	A	0.155339
bbj-a-57	Uric acid	44368122	0.000272502	0.004246		-0.01546	22	G	A	0.4228
finn-b-CD2_INSITU_MELANOMA_FACE_EXALLC	Melanoma in situ of other and unspecified parts of face (all cancers excluded)	44368122	0.000279801	0.1604		0.5829	22	G	A	0.2244
ukb-b-10753	Diabetes diagnosed by doctor	44368122	0.000280001	0.000613327	461578	0.00222643	22	G	A	0.15544
finn-b-CD2_INSITU_MELANOMA_FACE	Melanoma in situ of other and unspecified parts of face	44368122	0.000281397	0.1599		0.5808	22	G	A	0.2244
ukb-e-6179_p3_CSA	Mineral and other dietary supplements	44368122	0.000287402	0.06055		0.2196	22	G	A	0.7985
ukb-a-272	Impedance of arm (right)	44368122	0.000289321	0.0023559	331279	0.00853946	22	G	A	0.155339
met-d-XL_HDL_C_pct	Cholesterol to total lipids ratio in very large HDL	44368122	0.000299999	0.00545107		-0.0201773	22	G	A	0.155294
ebi-a-GCST006697	Parental longevity (combined parental attained age, Martingale residuals)	44368122	0.000299999	0.00308979	389166	-0.0110716	22	G	A	0.155325
met-d-XS_VLDL_L	Total lipids in very small VLDL	44368122	0.000309999	0.00561073		0.0203138	22	G	A	0.155299
prot-c-5024_67_1	Rb	44368122	0.000312601	0.0587503	996	0.2125	22	G	A
ukb-b-12651	Diagnoses - secondary ICD10: E78.0 Pure hypercholesterolaemia	44368122	0.00032	0.000616232	463010	-0.00221604	22	G	A	0.155427
ebi-a-GCST004602	Mean corpuscular volume	44368122	0.000329102	0.00486082	172433	0.0174566	22	G	A	0.1551
ukb-b-19379	Impedance of arm (left)	44368122	0.000329997	0.00195214	454850	0.00700766	22	G	A	0.15541
ieu-a-275	Red blood cell count	44368122	0.0003312	0.0029	49291	0.0101	22	G	A
prot-a-2166	Platelet-activating factor acetylhydrolase IB subunit beta	44368122	0.000338844	0.0341	3301	-0.1221	22	G	A	0.15576
ieu-b-4953	Liver cell carcinoma	44368122	0.000340001	6.78878e-05	372184	0.000243189	22	G	A	0.155579
ebi-a-GCST006701	Parental longevity (father's attained age)	44368122	0.000340001	0.00300381	415311	-0.0105855	22	G	A	0.155134
ebi-a-GCST90001706	BAFF-R on IgD+ CD38- naive B cell	44368122	0.000362802	0.0448	1837	-0.1601	22	G	A	0.1764
ukb-d-2664_2	Reason for reducing amount of alcohol drunk: Doctor's advice	44368122	0.000368562	0.000784287	134033	0.00279341	22	G	A	0.154369
ukb-b-4263	Number of full brothers	44368122	0.000369999	0.00225543	455347	-0.0080364	22	G	A	0.155412
ukb-a-273	Impedance of arm (left)	44368122	0.000379988	0.00236593	331292	0.00840766	22	G	A	0.155339
ubm-a-953	NET25 0007	44368122	0.000380189	0.0218	7916	0.0775	22	G	A	0.15288
ukb-a-142	Treatment/medication code: allopurinol	44368122	0.000392094	0.000353996	337159	-0.00125505	22	G	A	0.155339
ukb-d-30140_irnt	Neutrophill count	44368122	0.000407465	0.00328315	349856	-0.0116067	22	G	A	0.154778
ebi-a-GCST90012040	ST2 protein levels	44368122	0.000410998	0.0121	21758	0.0428	22	G	A	0.1831
ieu-b-32	lymphocyte cell count	44368122	0.000417004	0.00261	523519	-0.009214	22	G	A	0.15595
ieu-b-5089	LDL cholesterol	44368122	0.000430002	0.00428219		-0.0145564	22	G	A	0.155805
ebi-a-GCST90012077	C-C motif chemokine 20 levels	44368122	0.000447497	0.0142	21758	0.0498	22	G	A	0.1855
ukb-b-15590	Hip circumference	44368122	0.000460002	0.00275655	462117	-0.00966253	22	G	A	0.155435
ukb-b-7376	Impedance of leg (right)	44368122	0.000470002	0.00249262	454863	0.00872272	22	G	A	0.155409
ebi-a-GCST008048	Type 2 diabetes	44368122	0.00048227	0.0185495	10106	0.0647456	22	G	A	0.233701
prot-a-757	Cytochrome P450 3A4	44368122	0.000489779	0.0341	3301	0.1189	22	G	A	0.15576
ukb-e-104670_AFR	Vitamin supplement user	44368122	0.000496204	0.1144		0.3984	22	G	A	0.805
ukb-b-18096	Leg fat mass (right)	44368122	0.0005	0.00221691	454846	-0.00771528	22	G	A	0.155412
ebi-a-GCST007517	Type 2 diabetes	44368122	0.0005254	0.0101	298957	0.0328	22	G	A	0.1779
ubm-a-2244	NET100 1088	44368122	0.000537032	0.0218	7916	-0.0755	22	G	A	0.15288
ukb-b-3304	Friendships satisfaction	44368122	0.000539995	0.00369263	151232	-0.0127795	22	G	A	0.156545
ukb-b-6235	Operation code: cholecystectomy/gall bladder removal	44368122	0.000549997	0.00055597	462933	-0.00192218	22	G	A	0.155423
met-d-XS_VLDL_FC	Free cholesterol in very small VLDL	44368122	0.000569994	0.00560845		0.0195427	22	G	A	0.155299
finn-b-ATOPIC_STRICT	Atopic dermatitis, strict definition	44368122	0.000605202	0.0247		-0.0848	22	G	A	0.2243
met-d-XXL_VLDL_P	Concentration of chylomicrons and extremely large VLDL particles	44368122	0.00061	0.00549465		-0.0180856	22	G	A	0.155299
ukb-b-8338	Arm fat mass (left)	44368122	0.000619998	0.00271885	454684	-0.00930296	22	G	A	0.15543
met-d-HDL_P	Concentration of HDL particles	44368122	0.000629999	0.00536162		-0.0169261	22	G	A	0.155299
finn-b-RX_STATIN	Statin medication	44368122	0.000645402	0.0107		-0.0365	22	G	A	0.2244
ukb-a-271	Impedance of leg (left)	44368122	0.000663804	0.00305455	331296	0.0103981	22	G	A	0.155339
finn-b-I9_HYPTENS_EXNONE	Hypertension (no controls excluded)	44368122	0.000683896	0.0109		-0.0371	22	G	A	0.2244
finn-b-I9_HYPTENS	Hypertension	44368122	0.0006844	0.0109		-0.0371	22	G	A	0.2243
met-d-XL_VLDL_TG	Triglycerides in very large VLDL	44368122	0.000690001	0.00546432		-0.0172648	22	G	A	0.155299
finn-b-I9_HYPERTENSION	Hypertensive diseases	44368122	0.000714003	0.0109		-0.0369	22	G	A	0.2244
finn-b-FG_HYPERTENSION	Hypertensive diseases (excluding secondary)	44368122	0.000714003	0.0109		-0.0369	22	G	A	0.2244
met-d-L_LDL_TG_pct	Triglycerides to total lipids ratio in large LDL	44368122	0.000739997	0.00560003		0.018593	22	G	A	0.155299
ukb-b-8988	Diagnoses - main ICD10: K80.1 Calculus of gallbladder with other cholecystitis	44368122	0.000739997	0.00026299	463010	-0.000887789	22	G	A	0.155427
ubm-a-1312	NET100 0156	44368122	0.000758578	0.0216	7916	-0.0728	22	G	A	0.15288
ukb-b-4535	logMAR, final (left)	44368122	0.000769999	0.00611741	100983	-0.0205726	22	G	A	0.156304
ukb-b-16099	Leg fat-free mass (left)	44368122	0.000769999	0.00180336	454805	-0.0060657	22	G	A	0.155413
met-d-L_HDL_FC_pct	Free cholesterol to total lipids ratio in large HDL	44368122	0.000779992	0.00530934		0.0183741	22	G	A	0.155299
bbj-a-61	Serum creatinine	44368122	0.000783899	0.003675		-0.01234	22	G	A	0.4228
prot-a-894	Elongation factor 1-beta	44368122	0.000794328	0.0341	3301	-0.1143	22	G	A	0.15576
ebi-a-GCST005064	Aspartate aminotransferase levels	44368122	0.000841763	0	9463	0.02	22	G	A
ukb-e-4631_AFR	Ever unenthusiastic/disinterested for a whole week	44368122	0.000842694	0.06611		0.2207	22	G	A	0.8132
met-c-938	Tyrosine	44368122	0.000850002	0.011703	22698	0.039059	22	G	A	0.209683
bbj-a-153	Type 2 diabetes	44368122	0.000864868	0.00832419		0.0277292	22	G	A	0.422345
met-d-SFA	Saturated fatty acids	44368122	0.000870001	0.005657		-0.0179288	22	G	A	0.155271
ebi-a-GCST90002359	Platelet count	44368122	0.000886993	0.016955	9367	-0.056385	22	G	A	0.237363
ukb-b-17271	Leg predicted mass (left)	44368122	0.00089	0.00179164	454799	-0.00595512	22	G	A	0.155412
finn-b-K11_CHOLELITH	Cholelithiasis	44368122	0.000922295	0.0144		-0.0476	22	G	A	0.2245
ebi-a-GCST90011998	Growth differentiation factor-15 levels	44368122	0.000927705	0.0117	21758	0.0386	22	G	A	0.1834
finn-b-C3_LIVER_INTRAHEPATIC_BILE_DUCTS	Malignant neoplasm of liver and intrahepatic bile ducts	44368122	0.000957789	0.0977		0.3227	22	G	A	0.2244
ukb-b-18596	Pain type(s) experienced in last month: Neck or shoulder pain	44368122	0.000959997	0.00120784	461857	-0.00398944	22	G	A	0.155417
finn-b-C3_LIVER_INTRAHEPATIC_BILE_DUCTS_EXALLC	Malignant neoplasm of liver and intrahepatic bile ducts (all cancers excluded)	44368122	0.000963607	0.0977		0.3226	22	G	A	0.2249
ubm-a-2635	NET100 1479	44368122	0.000977237	0.022	7916	-0.0726	22	G	A	0.15288
prot-b-51	cathepsin D	44368122	0.000979603	0.0321	3394	0.1058	22	G	A	0.1895
ieu-b-4850	Triglycerides	44368122	0.000992705	0.0064	78700	-0.0209	22	G	A
prot-c-3503_4_2	Integrin a1b1	44368122	0.000997493	0.0572251	996	0.1889	22	G	A
