# Supplementary material for: Causal effects for genetic variants of osteoprotegerin on the risk of acute myocardial infarction and coronary heart disease: A two-sample Mendelian randomization study
Source: Front Cardiovasc Med. 2023 Mar 7;10:1041231. doi: 10.3389/fcvm.2023.1041231 (PMC10028206; doi:10.3389/fcvm.2023.1041231)
Supplement: Supplementary file 8 [file Table_9.XLSX]

## Sheet: Sheet1
ID	Trait	Position	P	SE	N	Beta	CHR	EA	NEA	EAF
ieu-b-4808	25 hydroxyvitamin D level	27021913	0	0.006506		-0.035506	1	C	G	0.023438
eqtl-a-ENSG00000117713	ENSG00000117713	27021913	7.01455e-247	0.0305218	20861	-1.02423	1	C	G	0.0365514
ebi-a-GCST90012110	Sex hormone-binding globulin levels adjusted for BMI	27021913	1.49968e-204	0.00276285	368929	-0.0812431	1	C	G	0.023441
ebi-a-GCST90012111	Sex hormone-binding globulin levels	27021913	7.29458e-150	0.00308292	370125	-0.0782265	1	C	G	0.023432
ebi-a-GCST90012108	Sex hormone-binding globulin levels adjusted for BMI	27021913	1.09901e-135	0.00382778	180094	-0.0898475	1	C	G	0.023163
ebi-a-GCST90012109	Sex hormone-binding globulin levels	27021913	3.49945e-111	0.00408954	180726	-0.0871136	1	C	G	0.023158
eqtl-a-ENSG00000204160	ENSG00000204160	27021913	4.28549e-108	0.0311818	20861	0.688687	1	C	G	0.0365514
ukb-d-30830_irnt	SHBG	27021913	1.06782e-99	0.0075298	312215	-0.15965	1	C	G	0.023464
ieu-b-4871	Sex hormone binding globulin (SHBG)	27021913	1.69981e-91	0.0106449		-0.215959	1	C	G	0.022866
ebi-a-GCST90012106	Sex hormone-binding globulin levels adjusted for BMI	27021913	2.80027e-82	0.00405846	188908	-0.0740086	1	C	G	0.023704
ukb-d-30830_raw	SHBG	27021913	1.79267e-75	0.21095	312215	-3.879	1	C	G	0.023464
eqtl-a-ENSG00000060642	ENSG00000060642	27021913	1.8412e-66	0.031388	20861	-0.540535	1	C	G	0.0365514
ebi-a-GCST90012107	Sex hormone-binding globulin levels	27021913	1.39991e-52	0.00467318	189473	-0.0695129	1	C	G	0.02369
ebi-a-GCST90012113	Total testosterone levels	27021913	6.70039e-51	0.0101428	194453	-0.147891	1	C	G	0.023106
ieu-b-4870	Sex hormone binding globulin (SHBG)	27021913	4.10015e-50	0.00984242		-0.146504	1	C	G	0.023317
ebi-a-GCST90002412	Low density lipoprotein cholesterol levels	27021913	9.20026e-48	0.00630213	431167	0.0914981	1	C	G	0.023223
ieu-b-4865	Total Testosterone	27021913	1.59993e-44	0.0104187		-0.145864	1	C	G	0.022847
ukb-d-30770_irnt	IGF-1	27021913	2.27719e-42	0.0077113	342439	-0.10521	1	C	G	0.023524
ukb-d-30770_raw	IGF-1	27021913	6.07435e-41	0.043736	342439	-0.58613	1	C	G	0.023524
ebi-a-GCST90013405	Liver enzyme levels (alanine transaminase)	27021913	2.19989e-39	0.00129585	437267	0.0169768	1	C	G	0.023186
ieu-b-108	apolipoprotein B	27021913	7.70016e-39	0.00692945		0.0903258	1	C	G	0.023148
ieu-b-109	HDL cholesterol	27021913	3.90032e-37	0.00636562		-0.0810512	1	C	G	0.023124
ieu-b-111	triglycerides	27021913	6.29941e-35	0.00663594		0.0818126	1	C	G	0.023157
ukb-d-30640_raw	Apoliprotein B	27021913	3.47456e-33	0.0018763	342590	0.022522	1	C	G	0.023531
ukb-d-30880_irnt	Urate	27021913	8.12643e-33	0.0067482	343836	0.080523	1	C	G	0.023533
ukb-d-30880_raw	Urate	27021913	1.51635e-32	0.54452	343836	6.4691	1	C	G	0.023533
ukb-d-30640_irnt	Apoliprotein B	27021913	1.72982e-31	0.0078799	342590	0.092	1	C	G	0.023531
ukb-d-30620_irnt	Alanine aminotransferase	27021913	3.54242e-31	0.0074161	344136	0.086131	1	C	G	0.023537
ukb-d-30850_raw	Testosterone	27021913	7.12525e-30	0.022413	312102	-0.2545	1	C	G	0.023615
ukb-d-30760_irnt	HDL cholesterol	27021913	3.02134e-29	0.0075634	315133	-0.084919	1	C	G	0.023485
ukb-d-30870_irnt	Triglycerides	27021913	4.14286e-29	0.0077013	343992	0.086252	1	C	G	0.023534
ukb-d-30710_irnt	C-reactive protein	27021913	5.04778e-29	0.0079333	343524	-0.088711	1	C	G	0.023531
ebi-a-GCST90012102	Bioavailable testosterone levels	27021913	3.80014e-28	0.008356	188507	0.0930986	1	C	G	0.023696
ukb-d-30760_raw	HDL cholesterol	27021913	2.97852e-26	0.0029106	315133	-0.030855	1	C	G	0.023485
ukb-d-30870_raw	Triglycerides	27021913	1.93776e-25	0.0079572	343992	0.082948	1	C	G	0.023534
ieu-b-4869	Bioavailable Testosterone	27021913	1.99986e-25	0.010923		0.113801	1	C	G	0.023492
finn-b-RX_STATIN	Statin medication	27021913	3.96643e-25	0.0236		0.2449	1	C	G	0.03745
ieu-b-107	apolipoprotein A-I	27021913	4.60045e-25	0.00655146		-0.0677438	1	C	G	0.023139
ukb-d-30090_irnt	Platelet crit	27021913	4.82614e-23	0.00755326	350471	0.0746707	1	C	G	0.0234631
ukb-d-30840_irnt	Total bilirubin	27021913	1.06684e-22	0.0076336	342829	0.074856	1	C	G	0.023542
met-d-M_HDL_CE	Cholesteryl esters in medium HDL	27021913	3.90032e-22	0.0127947		-0.121062	1	C	G	0.022956
met-d-TG_by_PG	Ratio of triglycerides to phosphoglycerides	27021913	4.19952e-22	0.0128546		0.125977	1	C	G	0.022967
met-d-S_HDL_TG_pct	Triglycerides to total lipids ratio in small HDL	27021913	9.79941e-22	0.013179		0.125873	1	C	G	0.022956
met-d-M_HDL_C	Cholesterol in medium HDL	27021913	8.60003e-21	0.0127473		-0.116537	1	C	G	0.022956
met-d-HDL_CE	Cholesteryl esters in HDL	27021913	2.90001e-20	0.0124344		-0.114097	1	C	G	0.022956
ukb-d-30620_raw	Alanine aminotransferase	27021913	7.36716e-20	0.10789	344136	0.98423	1	C	G	0.023537
ukb-d-30630_irnt	Apoliprotein A	27021913	2.06871e-19	0.0076902	313387	-0.06929	1	C	G	0.023501
ukb-b-10787	Standing height	27021913	3.40017e-18	0.0043454	461950	0.0377902	1	C	G	0.023103
met-d-HDL_C	HDL cholesterol	27021913	4.19952e-18	0.0123721		-0.107152	1	C	G	0.022956
ukb-d-30630_raw	Apoliprotein A	27021913	7.54223e-18	0.0020857	313387	-0.017951	1	C	G	0.023501
met-d-M_HDL_TG_pct	Triglycerides to total lipids ratio in medium HDL	27021913	1e-17	0.0132889		0.112401	1	C	G	0.022956
ukb-d-30080_irnt	Platelet count	27021913	3.22775e-17	0.00768322	350474	0.0648345	1	C	G	0.0234629
met-d-M_HDL_P	Concentration of medium HDL particles	27021913	8.10028e-17	0.0127612		-0.104082	1	C	G	0.022956
met-d-M_HDL_C_pct	Cholesterol to total lipids ratio in medium HDL	27021913	1.39991e-16	0.0131908		-0.108522	1	C	G	0.022956
met-d-L_HDL_TG_pct	Triglycerides to total lipids ratio in large HDL	27021913	2.29985e-16	0.0130786		0.106218	1	C	G	0.022956
ebi-a-GCST90012002	Osteoprotegerin levels	27021913	2.6903e-16	0.0293	21758	-0.2399	1	C	G	0.0376
ebi-a-GCST90012104	Bioavailable testosterone levels	27021913	4.00037e-16	0.00663973	382988	0.053148	1	C	G	0.023414
ukb-d-30700_irnt	Creatinine	27021913	4.61105e-16	0.0064332	344104	-0.052249	1	C	G	0.023539
met-d-M_HDL_CE_pct	Cholesteryl esters to total lipids ratio in medium HDL	27021913	5.30029e-16	0.0134366		-0.107397	1	C	G	0.022956
ieu-b-110	LDL cholesterol	27021913	6.20012e-16	0.00695521		0.056229	1	C	G	0.023172
met-d-M_HDL_L	Total lipids in medium HDL	27021913	9.3994e-16	0.0128594		-0.101147	1	C	G	0.022956
met-d-L_VLDL_PL	Phospholipids in large VLDL	27021913	1.29987e-15	0.0133653		0.108316	1	C	G	0.022956
met-d-XL_VLDL_P	Concentration of very large VLDL particles	27021913	1.69981e-15	0.0133145		0.107975	1	C	G	0.022956
met-d-L_VLDL_P	Concentration of large VLDL particles	27021913	1.80011e-15	0.0133753		0.107993	1	C	G	0.022956
met-d-S_LDL_TG	Triglycerides in small LDL	27021913	1.9002e-15	0.0135133		0.110314	1	C	G	0.022956
met-d-XL_VLDL_PL	Phospholipids in very large VLDL	27021913	2.39994e-15	0.0133684		0.107343	1	C	G	0.022956
met-d-L_VLDL_FC	Free cholesterol in large VLDL	27021913	2.80027e-15	0.0133989		0.107371	1	C	G	0.022956
met-d-S_VLDL_TG	Triglycerides in small VLDL	27021913	3.19963e-15	0.0134424		0.108257	1	C	G	0.022956
met-d-XL_VLDL_L	Total lipids in very large VLDL	27021913	4.19952e-15	0.0133288		0.106443	1	C	G	0.022956
met-d-L_VLDL_L	Total lipids in large VLDL	27021913	4.30031e-15	0.0133869		0.106425	1	C	G	0.022956
met-d-XL_VLDL_FC	Free cholesterol in very large VLDL	27021913	4.40048e-15	0.0134178		0.106494	1	C	G	0.022956
ukb-d-30840_raw	Total bilirubin	27021913	5.17726e-15	0.034411	342829	0.26919	1	C	G	0.023542
met-d-XL_VLDL_TG	Triglycerides in very large VLDL	27021913	6.00067e-15	0.0132501		0.1057	1	C	G	0.022956
met-d-VLDL_TG	Triglycerides in VLDL	27021913	6.59933e-15	0.0133305		0.106284	1	C	G	0.022956
eqtl-a-ENSG00000142733	ENSG00000142733	27021913	8.01124e-15	0.0316484	20861	-0.24582	1	C	G	0.0365514
met-d-L_VLDL_TG	Triglycerides in large VLDL	27021913	1.20005e-14	0.0133292		0.10457	1	C	G	0.022956
met-d-M_HDL_FC	Free cholesterol in medium HDL	27021913	1.29987e-14	0.0126075		-0.0958181	1	C	G	0.022956
met-d-HDL_L	Total lipids in HDL	27021913	1.69981e-14	0.0124395		-0.0944749	1	C	G	0.022956
met-d-ApoA1	Apolipoprotein A1	27021913	2.09991e-14	0.0126775		-0.0949136	1	C	G	0.022956
met-d-M_LDL_TG	Triglycerides in medium LDL	27021913	2.60016e-14	0.0136483		0.105358	1	C	G	0.022956
met-d-Total_TG	Total triglycerides	27021913	2.60016e-14	0.0134087		0.105084	1	C	G	0.022956
ukb-d-30780_raw	LDL direct	27021913	2.97303e-14	0.0067917	343621	0.051616	1	C	G	0.023549
met-d-HDL_PL	Phospholipids in HDL	27021913	9.49948e-14	0.0125225		-0.0915858	1	C	G	0.022956
met-d-M_HDL_PL	Phospholipids in medium HDL	27021913	1e-13	0.0129521		-0.094473	1	C	G	0.022956
met-d-S_VLDL_P	Concentration of small VLDL particles	27021913	1.10002e-13	0.0136731		0.10249	1	C	G	0.022956
met-d-L_HDL_CE	Cholesteryl esters in large HDL	27021913	1.59993e-13	0.0122317		-0.0916588	1	C	G	0.022956
met-d-L_VLDL_C	Cholesterol in large VLDL	27021913	1.9002e-13	0.0135481		0.101476	1	C	G	0.022956
ukb-d-30610_irnt	Alkaline phosphatase	27021913	2.79062e-13	0.0077237	344292	-0.056418	1	C	G	0.023542
met-d-XL_VLDL_C	Cholesterol in very large VLDL	27021913	2.80027e-13	0.0135293		0.100515	1	C	G	0.022956
met-d-M_VLDL_TG	Triglycerides in medium VLDL	27021913	2.80027e-13	0.0134582		0.100947	1	C	G	0.022956
met-d-ApoB_by_ApoA1	Ratio of apolipoprotein B to apolipoprotein A1	27021913	3.19963e-13	0.0136366		0.0980921	1	C	G	0.022956
met-d-VLDL_L	Total lipids in VLDL	27021913	3.59998e-13	0.0135816		0.100987	1	C	G	0.022956
ukb-d-30780_irnt	LDL direct	27021913	3.69148e-13	0.0078149	343621	0.056788	1	C	G	0.023549
met-d-HDL_P	Concentration of HDL particles	27021913	4.00037e-13	0.0130091		-0.0927747	1	C	G	0.022956
met-d-VLDL_size	Average diameter for VLDL particles	27021913	4.10015e-13	0.0129137		0.09725	1	C	G	0.022956
ukb-d-30180_irnt	Lymphocyte percentage	27021913	9.04066e-13	0.00781669	349861	-0.0558474	1	C	G	0.0234617
met-d-XS_VLDL_TG	Triglycerides in very small VLDL	27021913	1.10002e-12	0.0136399		0.0972296	1	C	G	0.022956
met-d-XS_VLDL_CE_pct	Cholesteryl esters to total lipids ratio in very small VLDL	27021913	1.39991e-12	0.0130553		-0.0935861	1	C	G	0.022956
met-d-L_HDL_C	Cholesterol in large HDL	27021913	1.39991e-12	0.0121983		-0.0880215	1	C	G	0.022956
met-d-XL_HDL_TG_pct	Triglycerides to total lipids ratio in very large HDL	27021913	1.50003e-12	0.0130521		0.0945788	1	C	G	0.022956
met-d-LDL_TG	Triglycerides in LDL	27021913	1.50003e-12	0.0136995		0.0972523	1	C	G	0.022956
met-d-XXL_VLDL_P	Concentration of chylomicrons and extremely large VLDL particles	27021913	2.49977e-12	0.0133262		0.0964068	1	C	G	0.022956
met-d-XXL_VLDL_L	Total lipids in chylomicrons and extremely large VLDL	27021913	2.99985e-12	0.0133456		0.0962479	1	C	G	0.022956
met-d-S_VLDL_L	Total lipids in small VLDL	27021913	3.59998e-12	0.0137133		0.0964414	1	C	G	0.022956
met-d-VLDL_PL	Phospholipids in VLDL	27021913	4.70002e-12	0.0136823		0.0964032	1	C	G	0.022956
met-d-M_HDL_PL_pct	Phospholipids to total lipids ratio in medium HDL	27021913	4.79954e-12	0.0131407		0.0913123	1	C	G	0.022956
ebi-a-GCST90012114	Total testosterone levels	27021913	5.10035e-12	0.00427837	425097	-0.028585	1	C	G	0.023392
met-d-L_HDL_PL	Phospholipids in large HDL	27021913	5.90065e-12	0.0121921		-0.0854457	1	C	G	0.022956
met-d-L_HDL_L	Total lipids in large HDL	27021913	7.19946e-12	0.0121546		-0.084908	1	C	G	0.022956
met-d-XXL_VLDL_PL	Phospholipids in chylomicrons and extremely large VLDL	27021913	8.49963e-12	0.0132969		0.0941687	1	C	G	0.022956
ukb-d-30200_irnt	Neutrophill percentage	27021913	1.1079e-11	0.00790091	349861	0.0536626	1	C	G	0.0234617
met-d-XXL_VLDL_FC	Free cholesterol in chylomicrons and extremely large VLDL	27021913	1.20005e-11	0.0133474		0.0944456	1	C	G	0.022956
met-d-XXL_VLDL_C	Cholesterol in chylomicrons and extremely large VLDL	27021913	1.29987e-11	0.0133521		0.0937575	1	C	G	0.022956
met-d-XXL_VLDL_TG	Triglycerides in chylomicrons and extremely large VLDL	27021913	2.09991e-11	0.013372		0.0931374	1	C	G	0.022956
met-d-XXL_VLDL_CE	Cholesteryl esters in chylomicrons and extremely large VLDL	27021913	2.49977e-11	0.0133797		0.0923948	1	C	G	0.022956
met-d-XL_VLDL_CE	Cholesteryl esters in very large VLDL	27021913	2.80027e-11	0.0136337		0.0924432	1	C	G	0.022956
met-d-S_HDL_TG	Triglycerides in small HDL	27021913	3.29989e-11	0.0134337		0.091188	1	C	G	0.022956
met-d-L_HDL_P	Concentration of large HDL particles	27021913	3.40017e-11	0.0121316		-0.0821591	1	C	G	0.022956
met-d-XS_VLDL_C_pct	Cholesterol to total lipids ratio in very small VLDL	27021913	3.59998e-11	0.0131234		-0.0876841	1	C	G	0.022956
met-d-L_VLDL_CE	Cholesteryl esters in large VLDL	27021913	3.69999e-11	0.0136855		0.0925148	1	C	G	0.022956
met-d-L_LDL_TG	Triglycerides in large LDL	27021913	4.79954e-11	0.0137263		0.0893112	1	C	G	0.022956
met-d-IDL_C_pct	Cholesterol to total lipids ratio in IDL	27021913	5.30029e-11	0.0135251		-0.0863291	1	C	G	0.022956
met-d-L_LDL_FC_pct	Free cholesterol to total lipids ratio in large LDL	27021913	7.70016e-11	0.0132016		-0.0873025	1	C	G	0.022956
ukb-d-30850_irnt	Testosterone	27021913	8.09096e-11	0.0050585	312102	-0.032876	1	C	G	0.023615
met-d-HDL_FC	Free cholesterol in HDL	27021913	1.09999e-10	0.0122744		-0.0795367	1	C	G	0.022956
met-d-IDL_TG_pct	Triglycerides to total lipids ratio in IDL	27021913	1.09999e-10	0.0133806		0.0847694	1	C	G	0.022956
met-d-L_HDL_CE_pct	Cholesteryl esters to total lipids ratio in large HDL	27021913	1.2e-10	0.0132531		-0.0842132	1	C	G	0.022956
met-d-VLDL_P	Concentration of VLDL particles	27021913	1.6e-10	0.0137752		0.0899264	1	C	G	0.022956
met-d-IDL_CE_pct	Cholesteryl esters to total lipids ratio in IDL	27021913	1.6e-10	0.0135964		-0.084435	1	C	G	0.022956
met-d-VLDL_FC	Free cholesterol in VLDL	27021913	1.79999e-10	0.0137483		0.0898536	1	C	G	0.022956
met-d-M_LDL_FC_pct	Free cholesterol to total lipids ratio in medium LDL	27021913	2.1e-10	0.0132706		-0.0871132	1	C	G	0.022956
met-d-IDL_TG	Triglycerides in IDL	27021913	2.99999e-10	0.0136904		0.0849184	1	C	G	0.022956
ukb-d-30610_raw	Alkaline phosphatase	27021913	3.17249e-10	0.20688	344292	-1.3013	1	C	G	0.023542
met-d-Total_P	Total concentration of lipoprotein particles	27021913	3.29997e-10	0.0130384		-0.0801529	1	C	G	0.022956
met-d-L_VLDL_PL_pct	Phospholipids to total lipids ratio in large VLDL	27021913	3.89996e-10	0.0134505		0.0837673	1	C	G	0.022958
ukb-b-17805	Medication for cholesterol, blood pressure, diabetes, or take exogenous hormones: Cholesterol lowering medication	27021913	4e-10	0.00312693	249710	0.0195587	1	C	G	0.023369
met-d-XS_VLDL_PL_pct	Phospholipids to total lipids ratio in very small VLDL	27021913	5e-10	0.0135214		0.0851841	1	C	G	0.022956
met-d-MUFA_pct	Ratio of monounsaturated fatty acids to total fatty acids	27021913	5.89997e-10	0.0132754		0.0871714	1	C	G	0.022967
ebi-a-GCST004607	Plateletcrit	27021913	6.72295e-10	0.0129382	164339	0.0798607	1	C	G	0.0227
met-d-XS_VLDL_TG_pct	Triglycerides to total lipids ratio in very small VLDL	27021913	7.00003e-10	0.0131553		0.0811624	1	C	G	0.022956
met-d-XL_HDL_TG	Triglycerides in very large HDL	27021913	9.29994e-10	0.0136097		0.0820333	1	C	G	0.022956
ukb-d-30140_irnt	Neutrophill count	27021913	9.46041e-10	0.00790322	349856	0.0483553	1	C	G	0.0234606
ieu-b-38	systolic blood pressure	27021913	1.35201e-09	0.099	676623	0.6001	1	C	G	0.0276
met-d-PUFA_by_MUFA	Ratio of polyunsaturated fatty acids to monounsaturated fatty acids	27021913	1.5e-09	0.0132812		-0.0849035	1	C	G	0.022967
ukb-d-30700_raw	Creatinine	27021913	1.54e-09	0.12447	344104	-0.75183	1	C	G	0.023539
met-d-M_VLDL_L	Total lipids in medium VLDL	27021913	1.6e-09	0.0137562		0.0853776	1	C	G	0.022956
met-d-L_HDL_FC	Free cholesterol in large HDL	27021913	1.89998e-09	0.01214		-0.0746601	1	C	G	0.022956
ukb-b-16881	Sitting height	27021913	1.89998e-09	0.00500138	461536	0.0300182	1	C	G	0.023103
ieu-b-4844	HDL cholesterol	27021913	1.90902e-09	0.0143	66961	-0.0861	1	C	G
ebi-a-GCST90012043	Membrane-bound aminopeptidase P levels	27021913	2.40398e-09	0.0592	21758	0.3534	1	C	G	0.0357
ukb-b-10912	Non-cancer illness code, self-reported: high cholesterol	27021913	2.80001e-09	0.00226958	462933	0.0134849	1	C	G	0.02311
met-d-S_LDL_TG_pct	Triglycerides to total lipids ratio in small LDL	27021913	3.40001e-09	0.0134224		0.0808899	1	C	G	0.022956
met-d-M_VLDL_CE_pct	Cholesteryl esters to total lipids ratio in medium VLDL	27021913	4.60002e-09	0.0130024		-0.0782845	1	C	G	0.022956
ebi-a-GCST90016666	Liver volume	27021913	4.79999e-09	0.0231169	32860	0.135348	1	C	G	0.023578
ebi-a-GCST90000615	Serum 25-Hydroxyvitamin D levels	27021913	7.47481e-09	0.00658215	417580	-0.0380441	1	C	G	0.022756
eqtl-a-ENSG00000130695	ENSG00000130695	27021913	8.17542e-09	0.0316787	14867	0.182625	1	C	G	0.0365514
met-d-XL_HDL_FC_pct	Free cholesterol to total lipids ratio in very large HDL	27021913	9.59997e-09	0.0122764		0.0703209	1	C	G	0.022956
ukb-a-107	Non-cancer illness code self-reported: gout	27021913	1.08425e-08	0.000955343	337159	0.00546183	1	C	G	0.0235751
ukb-d-30710_raw	C-reactive protein	27021913	1.327e-08	0.035068	343524	-0.19928	1	C	G	0.023531
met-d-HDL_size	Average diameter for HDL particles	27021913	1.79999e-08	0.0122719		-0.0718372	1	C	G	0.022956
ebi-a-GCST90000616	Serum 25-Hydroxyvitamin D levels	27021913	1.8395e-08	0.00658433	417580	-0.0370465	1	C	G	0.022751
met-d-L_HDL_C_pct	Cholesterol to total lipids ratio in large HDL	27021913	2e-08	0.013055		-0.0728983	1	C	G	0.022956
met-d-XL_VLDL_CE_pct	Cholesteryl esters to total lipids ratio in very large VLDL	27021913	2.19999e-08	0.0132837		-0.0796193	1	C	G	0.022976
ukb-b-11268	Treatment/medication code: simvastatin	27021913	2.30001e-08	0.00219188	462933	0.0122418	1	C	G	0.02311
met-d-L_LDL_TG_pct	Triglycerides to total lipids ratio in large LDL	27021913	2.69998e-08	0.0135819		0.0740421	1	C	G	0.022956
met-d-S_VLDL_PL	Phospholipids in small VLDL	27021913	3.2e-08	0.0138235		0.077807	1	C	G	0.022956
ukb-a-389	Standing height	27021913	3.58319e-08	0.00574306	336474	0.0316465	1	C	G	0.0235751
ukb-a-448	Medication for cholesterol blood pressure diabetes or take exogenous hormones: Cholesterol lowering medication	27021913	4.47332e-08	0.00367254	180203	0.0200936	1	C	G	0.0235751
ieu-b-4812	25 hydroxyvitamin D level	27021913	4.83092e-08	0.006506		-0.035506	1	C	G	0.023438
prot-b-41	X-prolyl aminopeptidase 2	27021913	6.11406e-08	0.0691	3394	0.375	1	C	G	0.0388
met-d-S_VLDL_CE	Cholesteryl esters in small VLDL	27021913	6.19998e-08	0.0138321		0.0757352	1	C	G	0.022956
eqtl-a-ENSG00000142765	ENSG00000142765	27021913	7.44029e-08	0.0316835	7287	-0.170464	1	C	G	0.0365514
finn-b-FG_HYPERTENSION	Hypertensive diseases (excluding secondary)	27021913	7.74694e-08	0.0241		0.1293	1	C	G	0.03745
finn-b-I9_HYPERTENSION	Hypertensive diseases	27021913	7.74694e-08	0.0241		0.1293	1	C	G	0.03745
met-d-GlycA	Glycoprotein acetyls	27021913	8.19993e-08	0.013796		0.0769553	1	C	G	0.022956
finn-b-I9_HYPTENS_EXNONE	Hypertension (no controls excluded)	27021913	8.70803e-08	0.0241		0.1289	1	C	G	0.03745
finn-b-I9_HYPTENS	Hypertension	27021913	8.96499e-08	0.0241		0.1287	1	C	G	0.03745
met-d-PUFA_pct	Ratio of polyunsaturated fatty acids to total fatty acids	27021913	9.20005e-08	0.0133311		-0.0742511	1	C	G	0.022967
met-d-M_VLDL_C_pct	Cholesterol to total lipids ratio in medium VLDL	27021913	9.29994e-08	0.0130366		-0.0719361	1	C	G	0.022956
met-d-S_VLDL_FC_pct	Free cholesterol to total lipids ratio in small VLDL	27021913	9.69996e-08	0.0132246		-0.0717044	1	C	G	0.022956
met-d-S_VLDL_PL_pct	Phospholipids to total lipids ratio in small VLDL	27021913	9.69996e-08	0.0132514		-0.0718943	1	C	G	0.022956
finn-b-O15_ICP_WIDE	Intrahepatic Cholestasis of Pregnancy (ICP), incl. ICD-8	27021913	1e-07	0.1148		0.6117	1	C	G	0.03731
met-d-S_LDL_P	Concentration of small LDL particles	27021913	1.2e-07	0.0138642		0.0741907	1	C	G	0.022956
ebi-a-GCST90000614	Serum 25-Hydroxyvitamin D levels	27021913	1.28239e-07	0.00668589	417580	-0.0353105	1	C	G	0.022751
met-d-M_VLDL_P	Concentration of medium VLDL particles	27021913	1.40001e-07	0.0138167		0.0753901	1	C	G	0.022956
ukb-a-142	Treatment/medication code: allopurinol	27021913	1.51422e-07	0.00085393	337159	0.00448393	1	C	G	0.0235751
met-d-VLDL_C	VLDL cholesterol	27021913	1.6e-07	0.0138316		0.0746132	1	C	G	0.022956
met-d-M_HDL_FC_pct	Free cholesterol to total lipids ratio in medium HDL	27021913	1.6e-07	0.0122817		-0.0660841	1	C	G	0.022956
met-d-XL_VLDL_C_pct	Cholesterol to total lipids ratio in very large VLDL	27021913	1.89998e-07	0.0132773		-0.0746632	1	C	G	0.022976
ieu-b-33	eosinophil cell count	27021913	1.89998e-07	0.006609	474236	0.034449	1	C	G	0.023526
met-d-S_LDL_FC_pct	Free cholesterol to total lipids ratio in small LDL	27021913	2e-07	0.013425		-0.0721461	1	C	G	0.022956
met-d-M_LDL_TG_pct	Triglycerides to total lipids ratio in medium LDL	27021913	2e-07	0.0136778		0.0697974	1	C	G	0.022956
met-d-Unsaturation	Degree of unsaturation	27021913	2.1e-07	0.0131794		-0.0710261	1	C	G	0.022967
met-d-S_HDL_CE	Cholesteryl esters in small HDL	27021913	2.39999e-07	0.0138804		-0.070622	1	C	G	0.022956
met-d-MUFA	Monounsaturated fatty acids	27021913	2.69998e-07	0.0137094		0.0740378	1	C	G	0.022967
ebi-a-GCST90012039	Chitinase-3-like protein 1 levels	27021913	3.05e-07	0.0294	21758	-0.1504	1	C	G	0.0376
met-d-M_VLDL_PL	Phospholipids in medium VLDL	27021913	3.29997e-07	0.0138292		0.0728355	1	C	G	0.022956
ieu-b-39	diastolic blood pressure	27021913	3.63697e-07	0.0566	695243	0.2881	1	C	G	0.0274
met-d-LDL_size	Average diameter for LDL particles	27021913	4.60002e-07	0.0135471		-0.0689637	1	C	G	0.022956
ukb-b-14898	Water intake	27021913	4.90004e-07	0.00605105	427588	0.0304463	1	C	G	0.023233
ukb-b-14177	Vascular/heart problems diagnosed by doctor: High blood pressure	27021913	5.39995e-07	0.00304475	461880	0.0152626	1	C	G	0.023112
met-d-S_LDL_PL	Phospholipids in small LDL	27021913	5.99998e-07	0.0138145		0.0665187	1	C	G	0.022956
ebi-a-GCST90000617	Serum 25-Hydroxyvitamin D levels	27021913	6.07673e-07	0.00659625	417580	-0.0329071	1	C	G	0.022756
met-d-S_VLDL_C	Cholesterol in small VLDL	27021913	6.59994e-07	0.0138487		0.0700787	1	C	G	0.022956
ukb-d-30690_raw	Cholesterol	27021913	7.24286e-07	0.0087889	344278	0.043547	1	C	G	0.023537
met-d-Omega_6_pct	Ratio of omega-6 fatty acids to total fatty acids	27021913	7.29995e-07	0.013483		-0.0700139	1	C	G	0.022967
ieu-b-4843	HDL cholesterol	27021913	7.67697e-07	0.0207	31861	-0.1025	1	C	G
ukb-a-108	Non-cancer illness code self-reported: high cholesterol	27021913	7.8251e-07	0.00264887	337159	0.0130848	1	C	G	0.0235751
ieu-b-30	white blood cell count	27021913	8.82999e-07	0.006184	562242	0.030423	1	C	G	0.023258
met-d-S_HDL_CE_pct	Cholesteryl esters to total lipids ratio in small HDL	27021913	8.9e-07	0.0136599		-0.0637174	1	C	G	0.022956
ukb-a-121	Treatment/medication code: simvastatin	27021913	1.00207e-06	0.00256265	337159	0.0125347	1	C	G	0.0235751
ebi-a-GCST004603	Platelet count	27021913	1.01899e-06	0.0128852	166066	0.0629823	1	C	G	0.0227
met-d-M_VLDL_TG_pct	Triglycerides to total lipids ratio in medium VLDL	27021913	1.09999e-06	0.0130802		0.0660268	1	C	G	0.022956
ukb-b-13352	Vascular/heart problems diagnosed by doctor: None of the above	27021913	1.09999e-06	0.00312873	461880	-0.0152292	1	C	G	0.023112
ukb-d-30730_irnt	Gamma glutamyltransferase	27021913	1.1896e-06	0.0073708	344104	-0.035803	1	C	G	0.023536
met-d-XL_HDL_CE_pct	Cholesteryl esters to total lipids ratio in very large HDL	27021913	1.40001e-06	0.0138495		-0.0643949	1	C	G	0.022956
ieu-b-4764	C-reactive protein	27021913	1.42801e-06	0.017	55952	-0.0821	1	C	G
eqtl-a-ENSG00000169442	ENSG00000169442	27021913	1.523e-06	0.0316901	20647	-0.152372	1	C	G	0.0365514
ukb-b-14057	Non-cancer illness code, self-reported: hypertension	27021913	2.1e-06	0.00300322	462933	0.0142466	1	C	G	0.02311
ukb-d-30110_irnt	Platelet distribution width	27021913	2.33507e-06	0.00785693	350470	0.0371012	1	C	G	0.0234631
met-d-XXL_VLDL_FC_pct	Free cholesterol to total lipids ratio in chylomicrons and extremely large VLDL	27021913	2.5e-06	0.0137938		-0.0685764	1	C	G	0.023028
ebi-a-GCST004632	Lymphocyte percentage of white cells	27021913	2.57602e-06	0.0126375	171748	-0.0594215	1	C	G	0.0226
ukb-b-15926	Cereal intake	27021913	2.69998e-06	0.00596504	441640	0.0279793	1	C	G	0.023129
met-c-881	Cholesterol esters in large VLDL	27021913	2.74998e-06	0.027831	19266	0.132705	1	C	G	0.038523
ukb-d-30690_irnt	Cholesterol	27021913	2.9073e-06	0.0076923	344278	0.035979	1	C	G	0.023537
prot-a-2799	Superoxide dismutase [Mn], mitochondrial	27021913	3.01995e-06	0.085	3301	0.397	1	C	G	0.02416
ukb-b-19234	Heel quantitative ultrasound index (QUI), direct entry	27021913	3.2e-06	0.00855594	265753	0.0398637	1	C	G	0.02297
ukb-b-20124	Heel bone mineral density (BMD) T-score, automated	27021913	3.2e-06	0.0085559	265753	0.0398723	1	C	G	0.02297
ukb-b-8875	Heel bone mineral density (BMD)	27021913	3.29997e-06	0.00855431	265627	0.0397664	1	C	G	0.02297
ukb-d-1747_1	Hair colour (natural, before greying): Blonde	27021913	3.37109e-06	0.00248724	360270	0.0115579	1	C	G	0.0234659
ebi-a-GCST90000026	Appendicular lean mass	27021913	3.40001e-06	0.00942835	205513	0.0461786	1	C	G	0.022836
ukb-b-20379	Medication for cholesterol, blood pressure, diabetes, or take exogenous hormones: None of the above	27021913	3.50002e-06	0.0043519	249710	-0.0201855	1	C	G	0.023369
ukb-b-3357	Birth weight of first child	27021913	3.50002e-06	0.0126682	200272	0.0587981	1	C	G	0.023149
met-c-904	Total cholesterol in medium LDL	27021913	3.51002e-06	0.027827	19266	0.131211	1	C	G	0.038523
met-d-HDL_TG	Triglycerides in HDL	27021913	3.79997e-06	0.0136607		0.0630882	1	C	G	0.022956
ebi-a-GCST90000618	Serum 25-Hydroxyvitamin D levels	27021913	3.93722e-06	0.00661534	496946	-0.0305276	1	C	G	0.0241413
met-c-905	Cholesterol esters in medium LDL	27021913	3.95003e-06	0.027837	19266	0.130634	1	C	G	0.038523
ukb-d-30250_irnt	Reticulocyte count	27021913	4.23838e-06	0.00789608	344729	0.0363173	1	C	G	0.0234559
met-c-880	Total cholesterol in large LDL	27021913	4.27996e-06	0.027834	19266	0.129917	1	C	G	0.038523
met-c-895	Total cholesterol in LDL	27021913	4.60002e-06	0.027829	19266	0.12965	1	C	G	0.038523
ebi-a-GCST90000025	Appendicular lean mass	27021913	4.95998e-06	0.0063	450243	0.0286	1	C	G	0.0232
finn-b-I9_HYPTENSESS	Hypertension, essential	27021913	4.97898e-06	0.026		0.1189	1	C	G	0.03722
met-d-L_VLDL_CE_pct	Cholesteryl esters to total lipids ratio in large VLDL	27021913	5e-06	0.0132544		-0.066965	1	C	G	0.022958
met-c-906	Total lipids in medium LDL	27021913	5.33998e-06	0.027828	19266	0.128838	1	C	G	0.038523
met-c-908	Phospholipids in medium LDL	27021913	5.39002e-06	0.027841	19266	0.128762	1	C	G	0.038523
met-d-S_HDL_C	Cholesterol in small HDL	27021913	5.39995e-06	0.0138349		-0.0620797	1	C	G	0.022956
met-d-S_LDL_C_pct	Cholesterol to total lipids ratio in small LDL	27021913	5.49997e-06	0.0139177		-0.0633652	1	C	G	0.022956
met-d-S_LDL_L	Total lipids in small LDL	27021913	5.69994e-06	0.0138471		0.062306	1	C	G	0.022956
ebi-a-GCST90002386	High light scatter reticulocyte percentage of red cells	27021913	6.80002e-06	0.00709318	408112	0.0319125	1	C	G	0.02327
ukb-d-30240_irnt	Reticulocyte percentage	27021913	6.87163e-06	0.00799825	344728	0.0359737	1	C	G	0.023456
met-c-907	Concentration of medium LDL particles	27021913	7.12e-06	0.027827	19266	0.127086	1	C	G	0.038523
met-c-924	Total cholesterol in small LDL	27021913	7.25003e-06	0.027819	19266	0.126504	1	C	G	0.038523
met-c-883	Total lipids in large LDL	27021913	7.26993e-06	0.027843	19266	0.126996	1	C	G	0.038523
met-d-Tyr	Tyrosine	27021913	7.29995e-06	0.0138377		-0.0620465	1	C	G	0.02298
ukb-d-30890_raw	Vitamin D	27021913	9.18671e-06	0.1712	329247	-0.75936	1	C	G	0.023376
ieu-b-4814	Height	27021913	1.048e-05	0.0844	94451	0.3721	1	C	G
ukb-d-30810_irnt	Phosphate	27021913	1.09691e-05	0.0080859	314658	0.035556	1	C	G	0.023486
ebi-a-GCST004613	Sum neutrophil eosinophil counts	27021913	1.16899e-05	0.01271	170384	0.0557128	1	C	G	0.0226
met-c-884	Concentration of large LDL particles	27021913	1.17001e-05	0.027844	19266	0.124049	1	C	G	0.038523
met-d-XS_VLDL_PL	Phospholipids in very small VLDL	27021913	1.2e-05	0.0136575		0.0592724	1	C	G	0.022956
ukb-b-17409	Trunk fat-free mass	27021913	1.2e-05	0.00412729	454508	0.0180431	1	C	G	0.023102
ukb-d-1747_4	Hair colour (natural, before greying): Dark brown	27021913	1.2104e-05	0.00378466	360270	-0.0165608	1	C	G	0.0234659
met-c-843	Apolipoprotein B	27021913	1.25e-05	0.028305	18398	0.125578	1	C	G	0.039014
finn-b-O15_ICP_EXMORE	Intrahepatic Cholestasis of Pregnancy (ICP) (more controls excluded)	27021913	1.27101e-05	0.1303		0.5688	1	C	G	0.0376
met-d-S_VLDL_TG_pct	Triglycerides to total lipids ratio in small VLDL	27021913	1.29999e-05	0.0133986		0.060861	1	C	G	0.022956
ukb-b-9685	Trunk predicted mass	27021913	1.29999e-05	0.004114	454463	0.0179126	1	C	G	0.023103
met-c-885	Phospholipids in large LDL	27021913	1.40001e-05	0.027859	19266	0.122729	1	C	G	0.038523
met-c-925	Total lipids in small LDL	27021913	1.42001e-05	0.027819	19266	0.122775	1	C	G	0.038523
ukb-d-30810_raw	Phosphate	27021913	1.42249e-05	0.0012987	314658	0.0056368	1	C	G	0.023486
met-c-927	Total cholesterol in small VLDL	27021913	1.45999e-05	0.027848	19266	0.122165	1	C	G	0.038523
met-d-M_VLDL_FC	Free cholesterol in medium VLDL	27021913	1.5e-05	0.0138487		0.0620635	1	C	G	0.022956
met-c-867	Total cholesterol in IDL	27021913	1.51999e-05	0.027855	19266	0.122279	1	C	G	0.038523
met-d-XL_HDL_PL_pct	Phospholipids to total lipids ratio in very large HDL	27021913	1.6e-05	0.0127225		-0.0567978	1	C	G	0.022956
finn-b-O15_ICP	Intrahepatic Cholestasis of Pregnancy (ICP)	27021913	1.64199e-05	0.1294		0.5574	1	C	G	0.03731
finn-b-E4_HYPERCHOL	Pure hypercholesterolaemia	27021913	1.68601e-05	0.0432		0.1858	1	C	G	0.03748
ukb-b-12651	Diagnoses - secondary ICD10: E78.0 Pure hypercholesterolaemia	27021913	1.7e-05	0.0014968	463010	0.00643271	1	C	G	0.023107
ukb-b-11740	Medication for cholesterol, blood pressure or diabetes: Cholesterol lowering medication	27021913	1.7e-05	0.00437486	209638	0.0188006	1	C	G	0.022776
finn-b-RX_ANTIHYP	Antihypertensive medication - note that there are other indications	27021913	1.735e-05	0.0219		0.0942	1	C	G	0.03745
ieu-b-34	neutrophil cell count	27021913	1.78e-05	0.003952	519287	0.016972	1	C	G	0.02327
ukb-a-500	Heel bone mineral density (BMD) T-score automated	27021913	1.90397e-05	0.010368	194398	0.0443334	1	C	G	0.0235751
prot-a-1078	Ficolin-2	27021913	1.94984e-05	0.085	3301	0.3632	1	C	G	0.02416
met-d-VLDL_CE	Cholesteryl esters in VLDL	27021913	2e-05	0.013855		0.0608338	1	C	G	0.022956
ukb-d-30680_irnt	Calcium	27021913	2.0742e-05	0.0082388	315153	0.035071	1	C	G	0.023494
ebi-a-GCST004614	Granulocyte count	27021913	2.13599e-05	0.0127304	169822	0.0541061	1	C	G	0.0226
met-c-882	Free cholesterol in large LDL	27021913	2.27997e-05	0.027844	19266	0.119717	1	C	G	0.038523
ukb-b-19585	Duration to entering value	27021913	2.30001e-05	0.0138501	113410	-0.0586395	1	C	G	0.02333
ukb-d-30300_irnt	High light scatter reticulocyte count	27021913	2.31286e-05	0.00793989	344729	0.0336047	1	C	G	0.0234559
ukb-d-30680_raw	Calcium	27021913	2.4265e-05	0.00077326	315153	0.0032644	1	C	G	0.023494
ebi-a-GCST004629	Neutrophil count	27021913	2.50202e-05	0.0126928	170702	0.0534947	1	C	G	0.0226
met-c-926	Concentration of small LDL particles	27021913	2.78997e-05	0.027831	19266	0.118524	1	C	G	0.038523
met-d-DHA_pct	Ratio of docosahexaenoic acid to total fatty acids	27021913	2.80001e-05	0.0134826		-0.0604813	1	C	G	0.022967
ebi-a-GCST004626	Myeloid white cell count	27021913	2.943e-05	0.0127623	169219	0.0533183	1	C	G	0.0226
met-c-928	Free cholesterol in small VLDL	27021913	3.17001e-05	0.027834	19266	0.11728	1	C	G	0.038523
met-d-S_VLDL_FC	Free cholesterol in small VLDL	27021913	3.40001e-05	0.0138532		0.0584233	1	C	G	0.022956
ukb-d-30000_irnt	White blood cell (leukocyte) count	27021913	3.86598e-05	0.0079147	350470	0.0325721	1	C	G	0.0234617
ebi-a-GCST004620	Sum basophil neutrophil counts	27021913	4.03999e-05	0.0127168	170143	0.0522048	1	C	G	0.0226
ukb-d-30290_irnt	High light scatter reticulocyte percentage	27021913	4.04809e-05	0.00799832	344729	0.0328313	1	C	G	0.0234559
ukb-d-30890_irnt	Vitamin D	27021913	4.16956e-05	0.0081589	329247	-0.033434	1	C	G	0.023376
ukb-b-19560	Skin colour	27021913	4.39997e-05	0.00400902	456692	-0.0163722	1	C	G	0.023139
met-d-S_HDL_C_pct	Cholesterol to total lipids ratio in small HDL	27021913	4.49997e-05	0.0136909		-0.0544209	1	C	G	0.022956
met-d-M_LDL_P	Concentration of medium LDL particles	27021913	4.60002e-05	0.0138938		0.0575994	1	C	G	0.022956
ukb-d-30660_irnt	Direct bilirubin	27021913	4.63063e-05	0.0082584	292933	0.033641	1	C	G	0.023784
met-d-XL_VLDL_PL_pct	Phospholipids to total lipids ratio in very large VLDL	27021913	5.1e-05	0.0138763		0.0558968	1	C	G	0.022976
met-d-S_LDL_CE	Cholesteryl esters in small LDL	27021913	5.39995e-05	0.0138589		0.0568409	1	C	G	0.022956
finn-b-E4_LIPOPROT	Disorders of lipoprotein metabolism and other lipidaemias	27021913	5.40306e-05	0.0351		0.1419	1	C	G	0.03752
ukb-b-15851	Heel Broadband ultrasound attenuation, direct entry	27021913	5.99998e-05	0.00844669	265737	0.0339051	1	C	G	0.022972
met-c-910	Cholesterol esters in medium VLDL	27021913	6.50999e-05	0.027849	19266	0.112758	1	C	G	0.038523
met-c-869	Total lipids in IDL	27021913	6.60998e-05	0.027868	19266	0.112863	1	C	G	0.038523
met-d-XS_VLDL_P	Concentration of very small VLDL particles	27021913	7.10003e-05	0.0136671		0.0538187	1	C	G	0.022956
ebi-a-GCST004633	Neutrophil percentage of white cells	27021913	7.21506e-05	0.0126545	171542	0.0502269	1	C	G	0.0226
ukb-b-18009	Medication for cholesterol, blood pressure, diabetes, or take exogenous hormones: Blood pressure medication	27021913	7.39997e-05	0.00354462	249710	0.0140501	1	C	G	0.023369
met-c-929	Total lipids in small VLDL	27021913	8.79995e-05	0.027831	19266	0.110745	1	C	G	0.038523
ukb-b-20175	Systolic blood pressure, automated reading	27021913	8.99995e-05	0.0069458	436419	0.0272031	1	C	G	0.023077
finn-b-GOUT	Gout, FINNGEN	27021913	9.03005e-05	0.0664		0.26	1	C	G	0.03749
met-c-931	Phospholipids in small VLDL	27021913	9.1199e-05	0.027837	19266	0.110318	1	C	G	0.038523
finn-b-I9_HYPTENSESS_EXNONE	"Hypertension, essential" (no controls excluded)	27021913	9.517e-05	0.0249		0.097	1	C	G	0.03745
met-d-XL_HDL_CE	Cholesteryl esters in very large HDL	27021913	9.69996e-05	0.012403		-0.0509421	1	C	G	0.022956
met-d-L_LDL_PL_pct	Phospholipids to total lipids ratio in large LDL	27021913	9.80009e-05	0.0138616		-0.0525214	1	C	G	0.022956
ukb-b-1806	Number of symbol digit matches attempted	27021913	9.90011e-05	0.0138889	113106	0.0540678	1	C	G	0.023326
ieu-b-32	lymphocyte cell count	27021913	0.000103001	0.00636	524922	-0.024706	1	C	G	0.023232
met-d-L_LDL_C_pct	Cholesterol to total lipids ratio in large LDL	27021913	0.00012	0.013496		-0.0516798	1	C	G	0.022956
ukb-b-11497	Operation code: tonsillectomy +/- adenoids	27021913	0.00012	0.00251822	462933	-0.00966521	1	C	G	0.02311
met-d-S_VLDL_C_pct	Cholesterol to total lipids ratio in small VLDL	27021913	0.000129999	0.0134733		-0.0544049	1	C	G	0.022956
met-d-S_HDL_PL_pct	Phospholipids to total lipids ratio in small HDL	27021913	0.000129999	0.0133902		-0.0512964	1	C	G	0.022956
met-d-M_VLDL_FC_pct	Free cholesterol to total lipids ratio in medium VLDL	27021913	0.000129999	0.0131695		-0.0530064	1	C	G	0.022956
ukb-a-215	Illnesses of mother: High blood pressure	27021913	0.000131344	0.00386095	308780	0.0147642	1	C	G	0.0235751
met-c-870	Concentration of IDL particles	27021913	0.000131999	0.027868	19266	0.108154	1	C	G	0.038523
ukb-b-533	Ease of skin tanning	27021913	0.000140001	0.00671743	453065	0.0255513	1	C	G	0.023087
ukb-b-1061	Age high blood pressure diagnosed	27021913	0.000140001	0.013814	111148	-0.0524881	1	C	G	0.024382
ukb-b-5237	Coffee intake	27021913	0.00017	0.0054076	428860	-0.0202994	1	C	G	0.02308
met-c-933	Serum total cholesterol	27021913	0.000175999	0.027867	19266	0.105574	1	C	G	0.038523
met-d-S_HDL_PL	Phospholipids in small HDL	27021913	0.000179999	0.0137324		-0.0484352	1	C	G	0.022956
ebi-a-GCST004615	Hemoglobin concentration	27021913	0.000184599	0.0125718	172925	0.0470086	1	C	G	0.0227
finn-b-M13_GOUT	Gout	27021913	0.000189601	0.0667		0.2491	1	C	G	0.03787
ebi-a-GCST90012056	Matrix metalloproteinase-7 levels	27021913	0.0001945	0.0307	21758	0.1143	1	C	G	0.0375
met-d-XXL_VLDL_C_pct	Cholesterol to total lipids ratio in chylomicrons and extremely large VLDL	27021913	0.0002	0.0138825		-0.0554208	1	C	G	0.023028
ebi-a-GCST90002404	Red cell distribution width	27021913	0.0002	0.00706727	408112	-0.0262797	1	C	G	0.023307
met-c-930	Concentration of small VLDL particles	27021913	0.000203002	0.027828	19266	0.104892	1	C	G	0.038523
ebi-a-GCST90001776	CD25 on CD20- CD38- B cell	27021913	0.0002066	0.06956	3505	0.2584	1	C	G	0.0341
met-d-LDL_P	Concentration of LDL particles	27021913	0.00021	0.0138397		0.0517797	1	C	G	0.022956
ieu-a-22	Schizophrenia	27021913	0.000212701	0.0308	82315	-0.114099	1	C	G
ukb-a-65	Non-cancer illness code self-reported: deep venous thrombosis (dvt)	27021913	0.000214215	0.00113723	337159	-0.00420966	1	C	G	0.0235751
met-c-909	Total cholesterol in medium VLDL	27021913	0.000219999	0.027836	19266	0.103883	1	C	G	0.038523
met-d-M_LDL_CE	Cholesteryl esters in medium LDL	27021913	0.000219999	0.0138724		0.052347	1	C	G	0.022956
met-d-Gly	Glycine	27021913	0.000219999	0.013083		0.0425161	1	C	G	0.02296
met-d-Total_FA	Total fatty acids	27021913	0.000219999	0.0137396		0.0541674	1	C	G	0.022967
met-d-XS_VLDL_L	Total lipids in very small VLDL	27021913	0.000230001	0.0136153		0.0499828	1	C	G	0.022956
eqtl-a-ENSG00000260063	ENSG00000260063	27021913	0.000236548	0.0317008	14613	-0.116539	1	C	G	0.0365514
ukb-b-14395	Medication for cholesterol, blood pressure or diabetes: Blood pressure medication	27021913	0.00025	0.0044682	209638	0.0163655	1	C	G	0.022776
met-d-M_LDL_L	Total lipids in medium LDL	27021913	0.000259998	0.0138722		0.0504521	1	C	G	0.022956
ukb-b-12014	Medication for cholesterol, blood pressure or diabetes: None of the above	27021913	0.000269998	0.00488235	209638	-0.0177619	1	C	G	0.022776
met-d-ApoB	Apolipoprotein B	27021913	0.000280001	0.0138322		0.0508003	1	C	G	0.022956
ukb-b-13745	Irritability	27021913	0.000280001	0.00319051	442169	-0.0115954	1	C	G	0.023129
ukb-d-30060_irnt	Mean corpuscular haemoglobin concentration	27021913	0.000284977	0.0078718	350468	0.0285638	1	C	G	0.0234618
met-d-M_LDL_C_pct	Cholesterol to total lipids ratio in medium LDL	27021913	0.000290001	0.0138727		-0.0493885	1	C	G	0.022956
met-d-SFA	Saturated fatty acids	27021913	0.000290001	0.0137267		0.053552	1	C	G	0.022967
met-c-871	Phospholipids in IDL	27021913	0.000293002	0.027875	19266	0.102249	1	C	G	0.038523
met-d-S_LDL_C	Cholesterol in small LDL	27021913	0.000299999	0.0138648		0.0498034	1	C	G	0.022956
ukb-a-437	Vascular/heart problems diagnosed by doctor: High blood pressure	27021913	0.000300663	0.00359455	336683	0.0129935	1	C	G	0.0235751
prot-a-948	Ectonucleotide pyrophosphatase/phosphodiesterase family member 7	27021913	0.00030903	0.0851	3301	0.307	1	C	G	0.02416
ieu-b-4846	LDL cholesterol	27021913	0.0003094	0.0158	64115	0.0569	1	C	G
ieu-b-42	schizophrenia	27021913	0.000326701	0.0311	77096	-0.111703	1	C	G	0.032
met-d-M_LDL_PL	Phospholipids in medium LDL	27021913	0.000350002	0.0138716		0.0485929	1	C	G	0.022956
ebi-a-GCST006979	Heel bone mineral density	27021913	0.000389996	0.00608969	426824	0.0221295	1	C	G	0.023438
met-c-868	Free cholesterol in IDL	27021913	0.000400996	0.027869	19266	0.099912	1	C	G	0.038523
prot-a-1584	Integrin alpha-V: beta-5 complex	27021913	0.00040738	0.0851	3301	-0.3009	1	C	G	0.02416
ukb-a-195	Sitting height	27021913	0.000416323	0.00624689	336172	0.0220487	1	C	G	0.0235751
ukb-d-30070_irnt	Red blood cell (erythrocyte) distribution width	27021913	0.000418774	0.00789105	350473	-0.0278396	1	C	G	0.0234629
met-d-S_HDL_P	Concentration of small HDL particles	27021913	0.000430002	0.0138592		-0.0475946	1	C	G	0.022956
ukb-a-443	Blood clot DVT bronchitis emphysema asthma rhinitis eczema allergy diagnosed by doctor: Blood clot in the leg (DVT)	27021913	0.000431599	0.00114985	336782	-0.00404748	1	C	G	0.0235751
met-d-IDL_FC_pct	Free cholesterol to total lipids ratio in IDL	27021913	0.000449997	0.0137497		-0.048706	1	C	G	0.022956
ieu-b-4850	Triglycerides	27021913	0.000487798	0.0157	66687	0.0546	1	C	G
ebi-a-GCST90016667	Spleen volume	27021913	0.0005	0.0229158	32860	0.0797722	1	C	G	0.023578
ukb-a-435	Vascular/heart problems diagnosed by doctor: None of the above	27021913	0.000517392	0.00369158	336683	-0.0128158	1	C	G	0.0235751
ukb-d-30260_irnt	Mean reticulocyte volume	27021913	0.000523637	0.0079594	344728	-0.0276064	1	C	G	0.023456
ukb-b-13354	Whole body fat-free mass	27021913	0.000530005	0.00414345	454850	0.0143483	1	C	G	0.023096
ukb-d-30190_irnt	Monocyte percentage	27021913	0.000537353	0.00768267	349861	-0.0265931	1	C	G	0.0234617
ukb-b-14540	Whole body water mass	27021913	0.000539995	0.00415026	454888	0.0143578	1	C	G	0.023097
ukb-b-19520	Arm fat-free mass (right)	27021913	0.000539995	0.00412498	454753	0.0142644	1	C	G	0.023098
met-d-XL_VLDL_TG_pct	Triglycerides to total lipids ratio in very large VLDL	27021913	0.000560003	0.0134239		0.052656	1	C	G	0.022976
ukb-b-6324	Processed meat intake	27021913	0.000569994	0.0070127	461981	-0.0241541	1	C	G	0.023111
prot-a-129	Apolipoprotein D	27021913	0.000588844	0.0851	3301	0.2928	1	C	G	0.02416
ebi-a-GCST005195	Coronary artery disease	27021913	0.000599998	0.0237586	547261	0.0815303	1	C	G
ebi-a-GCST006941	Irritable mood	27021913	0.000617305	0.00793624	366726	-0.0271737	1	C	G	0.0222082
ebi-a-GCST90001489	CD39+ activated CD4 regulatory T cell Absolute Count	27021913	0.0006375	0.07428	3405	-0.2539	1	C	G	0.0327
ebi-a-GCST90001490	CD39+ activated CD4 regulatory T cell %activated CD4 regulatory T cell	27021913	0.000637602	0.07229	3437	-0.2471	1	C	G	0.0327
ukb-b-13823	Time to complete round	27021913	0.00064	0.00689431	454157	-0.0235414	1	C	G	0.023114
ukb-b-15625	Number of symbol digit matches made correctly	27021913	0.00064	0.0138937	113106	0.047442	1	C	G	0.023326
ukb-a-35	Comparative height size at age 10	27021913	0.000655647	0.00551591	332021	0.0187956	1	C	G	0.0235751
ebi-a-GCST90001495	CD39+ secreting CD4 regulatory T cell Absolute Count	27021913	0.000656901	0.07484	3405	-0.2552	1	C	G	0.0327
prot-a-3200	Selenoprotein S	27021913	0.000676083	0.0851	3301	0.2895	1	C	G	0.02416
ukb-d-30270_irnt	Mean sphered cell volume	27021913	0.000685362	0.00796689	344729	-0.0270508	1	C	G	0.0234559
met-d-M_HDL_TG	Triglycerides in medium HDL	27021913	0.000719996	0.0136816		0.0465335	1	C	G	0.022956
ukb-a-360	Systolic blood pressure automated reading	27021913	0.000727512	0.00819144	317754	0.0276791	1	C	G	0.0235751
ukb-a-488	Medication for cholesterol blood pressure or diabetes: Cholesterol lowering medication	27021913	0.000749325	0.00506423	154702	0.0170712	1	C	G	0.0235751
ebi-a-GCST90016670	Kidney volume	27021913	0.000749998	0.0208193	32860	0.0701643	1	C	G	0.023578
ukb-d-30660_raw	Direct bilirubin	27021913	0.000759137	0.007183	292933	0.024188	1	C	G	0.023784
ukb-b-6066	Tea intake	27021913	0.000759994	0.00709334	447485	-0.0238803	1	C	G	0.023118
met-d-IDL_PL_pct	Phospholipids to total lipids ratio in IDL	27021913	0.000830004	0.0139145		0.0452893	1	C	G	0.022956
ukb-b-16698	Arm predicted mass (right)	27021913	0.000840001	0.00411125	454746	0.0137222	1	C	G	0.023098
finn-b-CD2_BENIGN_OVARY_EXALLC	Benign neoplasm of ovary (all cancers excluded)	27021913	0.000907006	0.071		0.2355	1	C	G	0.03731
ukb-b-2988	Number of fluid intelligence questions attempted within time limit	27021913	0.000929994	0.0249833	149051	0.082681	1	C	G	0.02347
ebi-a-GCST005194	Coronary artery disease	27021913	0.000933104	0.0188	296525	0.0624	1	C	G	0.0248
prot-a-641	Cytochrome c oxidase subunit 8A, mitochondrial	27021913	0.000933254	0.0851	3301	0.2817	1	C	G	0.02416
finn-b-C3_VULVA_EXALLC	Malignant neoplasm of vulva (all cancers excluded)	27021913	0.000933598	0.3566		1.1803	1	C	G	0.03726
ukb-a-526	Diagnoses - main ICD10: F43 Reaction to severe stress and adjustment disorders	27021913	0.000937281	0.000188353	337199	0.00062321	1	C	G	0.0235751
